# Supplementary material
Source: HighWire-hosted journal article supplement (https://fn.bmjjournals.com/content/suppl/2007/04/18/adc.2006.107656)
Supplement: 923F176webonlyappendix.pdf [file 923F176webonlyappendix.pdf]

## Appendix 1. Study characteristics of the trials included in the systematic review of accuracy of pulse oximetry in detecting congenital heart disease in asymptomatic newborns

| Study                   |                                                                                           | Population      |                          |                                                                                         |                                                                                                                                                                            | Test                                                               |                            |                      | Outcome                                                                                                                 |                                                                                             |
|-------------------------|-------------------------------------------------------------------------------------------|-----------------|--------------------------|-----------------------------------------------------------------------------------------|----------------------------------------------------------------------------------------------------------------------------------------------------------------------------|--------------------------------------------------------------------|----------------------------|----------------------|-------------------------------------------------------------------------------------------------------------------------|---------------------------------------------------------------------------------------------|
| Study (Year)            | Quality                                                                                   | No. of newborns | No. of newborns with CHD | Inclusion criteria                                                                      | Exclusion criteria                                                                                                                                                         | Age at testing                                                     | Method of testing          | Frequency of testing | Cut off level                                                                                                           |                                                                                             |
| De-Wahl Granelli (2005) | Case control<br>Retrospective<br>Non consecutive enrolment<br>Test described<br>Not blind | 266             | 66                       | Cases – Normal full term infants                                                        |                                                                                                                                                                            | 12 hours (controls)<br>Prior to surgery (cases)                    | Right hand and either foot | Multiple             | Functional saturation <95% in right upper and lower limbs and readings in lower limb 3% higher or lower than right hand | Critical Congenital Heart Disease (CCHD) – duct dependant or cyanotic heart disease         |
| Bakr (2005)             | Cross sectional<br>Prospective<br>Consecutive<br>Test described<br>Not blind              | 5211            | 13                       | Asymptomatic newborns                                                                   | Symptomatic newborns<br>NICU admission                                                                                                                                     | Before discharge                                                   | Right hand and foot        | Multiple             | Fractional saturation <95% in right hand or foot                                                                        | Congenital Heart disease                                                                    |
| Arlettaz (2005)         | Cross sectional<br>Prospective<br>Consecutive<br>Test described<br>Not blind              | 3262            | 15                       | Healthy newborns ≥35w                                                                   | GA<35w<br>Symptomatic Respiratory disorder in newborns                                                                                                                     | 6-12 hours                                                         | Foot                       | Multiple             | Functional saturation in foot <95%                                                                                      | Congenital Heart disease of functional consequence                                          |
| Rosati (2005)           | Cross sectional<br>Prospective<br>Consecutive<br>Test described<br>Not blind              | 5292            | 3                        | Asymptomatic newborns                                                                   | Symptomatic prior to screening<br>Prenatal diagnosis of CHD                                                                                                                | >24 hours                                                          | N/A                        | Single               | Saturation ≤ 95% in foot                                                                                                | Critical Cardio Vascular Malformation (CCVM)                                                |
| Koppel (2003)           | Cross sectional<br>Prospective<br>Consecutive<br>Test not described<br>Not blind          | 11281           | 5                        | Asymptomatic newborns                                                                   | Symptomatic newborns<br>Prenatal diagnosis of CHD                                                                                                                          | >24 hours or at discharge                                          | Foot                       | Single               | Functional Saturation ≤ 95% in foot                                                                                     | Critical Cardio Vascular Malformation (CCVM)                                                |
| Richmond (2002)         | Cross sectional<br>Prospective<br>Consecutive<br>Test not described<br>Not blind          | 5626            | 40                       | Asymptomatic newborns                                                                   | Symptomatic newborns                                                                                                                                                       | ≥2 hours to before discharge                                       | Foot                       | Multiple             | Fractional saturation <95% in foot                                                                                      | Congenital Heart disease                                                                    |
| Reich (2002)            | Cross sectional<br>Prospective<br>Consecutive<br>Test described<br>Not blind              | 2114            | 3                        | Asymptomatic newborns                                                                   | Fetal echocardiogram,<br>Symptomatic newborns<br>NICU admission<br>Birth weight <1500g, assisted ventilation, transfer to a tertiary neonatal unit<br>Consent not provided | As close to discharge as possible                                  | Foot or hand               | Multiple             | Functional saturation ≤ 95% in foot or hand                                                                             | Cyanotic Congenital Heart disease                                                           |
| Hoke (2002)             | Case control<br>Ambispective<br>Arbitrary recruitment<br>Test described<br>Not blind      | 2908            | 36                       | Cases- Newborns with congenital heart disease<br>Controls- Healthy newborns at least 34 | Less than 34 weeks                                                                                                                                                         | Less than 6 hours of life, at 24 hours of life and/or at discharge | Right arm and either leg   | Multiple             | -functional saturation <95% in foot<br>-functional saturation <92% lower limb or 7% lower in foot than hand             | Critical Congenital Heart Disease (CCHD) – duct dependant or left heart obstructive disease |

---

weeks  
gestational  
age at birth

-functional  
saturation<94%  
foot  
-functional  
saturation<93%  
foot  
-functional  
saturation<92%  
foot  
-functional  
saturation<91%  
foot  
-functional  
saturation<90%  
foot

---
